# Supplementary material
Source: HighWire-hosted journal article supplement (https://ajnr-sso.highwirestaging.com/highwire/filestream/52195/field_highwire_adjunct_files/0/1332_table.pdf)
Supplement: 1332_table.pdf [file 1332_table.pdf]

**On-line Table 1: Clinical characteristics of the 8 patients with ICoVT**

| Patient No. | Age (years) | Sex | Main Clinical Manifestations                                                                                                                   | Risk Factors and Causes                       | Treatment                                | Clinical Evolution                                     |
|-------------|-------------|-----|------------------------------------------------------------------------------------------------------------------------------------------------|-----------------------------------------------|------------------------------------------|--------------------------------------------------------|
| 1           | 23          | F   | Thunderclap headache, seizures                                                                                                                 | Postpartum                                    | Heparin, VKA, AED                        | Complete clinical recovery at day 6                    |
| 2           | 31          | F   | Headache, left hemiparesis; in hospital: partial and generalized seizures with increase of deficit                                             | Postpartum, epidural anesthesia               | Heparin, VKA, AED                        | Complete clinical recovery at month 2                  |
| 3           | 37          | M   | Headache, left ataxia, partial seizures with secondary generalization; in hospital: recurrence of partial seizures, thrombosis of femoral vein | Behcet disease, Factor V Leiden               | Heparin, VKA, AED, steroids              | Complete clinical recovery at month 3                  |
| 4           | 40          | F   | Postural headache                                                                                                                              | Subdermal contraceptive implant               | Heparin, VKA                             | Complete clinical recovery at day 7                    |
| 5           | 23          | F   | Headache, aphasia                                                                                                                              | Hyperthyroidism                               | Heparin, VKA                             | Complete clinical recovery at month 3                  |
| 6           | 28          | F   | Headache, seizures, left hemiparesis                                                                                                           | Oral contraceptives                           | Heparin, VKA, AED                        | Complete clinical recovery at 6 weeks                  |
| 7           | 57          | M   | Headache, aphasia; in hospital: right hemiparesis                                                                                              | Meningitis                                    | Heparin, VKA, AED, steroids, antibiotics | Partial clinical recovery at 1 year (mild aphasia)     |
| 8           | 46          | F   | Headache, aphasia, right hemiparesis; in hospital: worsening of consciousness and deficit                                                      | Oral contraceptives, intracranial hypotension | Heparin, VKA, AED, steroids              | Partial clinical recovery at 1 year (mild hemiparesis) |

**Note:**—VKA indicates vitamin K antagonists; AED, antiepileptic drugs; ICoVT, isolated cortical venous thrombosis.
